# Supplementary material for: Synthesis of monodisperse aromatic azo oligomers toward gaining new insight into the isomerization of π-conjugated azo systems
Source: Royal Society of Chemistry journal article supplement (doi:10.1039/c9py00001a), 2019-01-01
Supplement: c9py00001a1.pdf [file c9py00001a1.pdf]

## Supporting Information for

# Synthesis of Monodisperse Aromatic Azo Oligomers toward a New Insight into the Isomerization of $\pi$ -Conjugated Azo systems

Meng Liu,<sup>†a</sup> Lu Yin,<sup>†a</sup> Laibing Wang,<sup>\*a,b</sup> Tengfei Miao,<sup>a</sup> Xiaoxiao Cheng,<sup>a</sup> Yong Wang,<sup>\*a</sup> Wei Zhang,<sup>\*a</sup> and Xiulin Zhu<sup>a,c</sup>

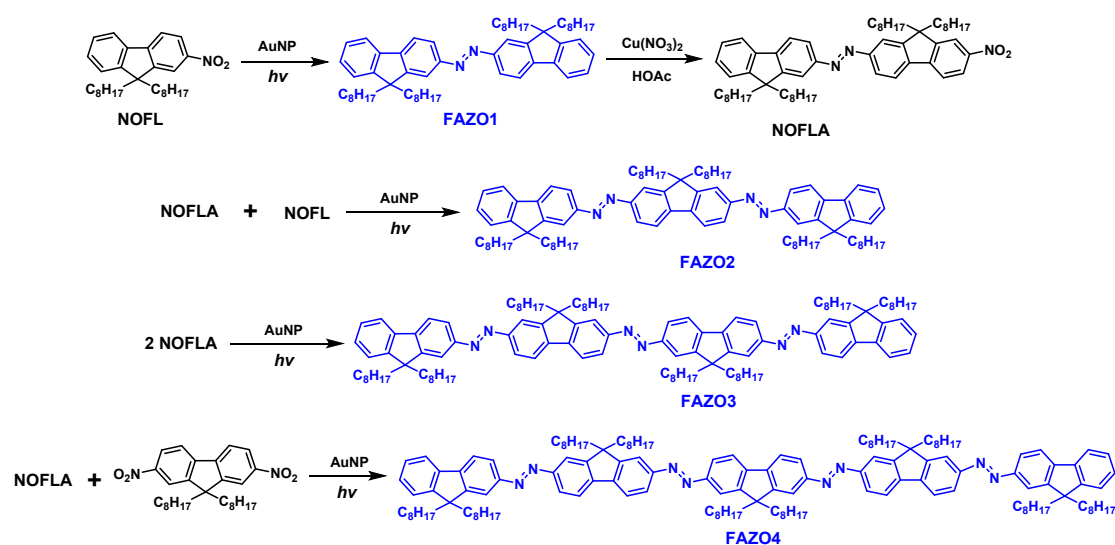

**Scheme 1.** Synthetic routes of aromatic Azo derivatives (FAZO<sub>n</sub>, n = 1, 2, 3 and 4).

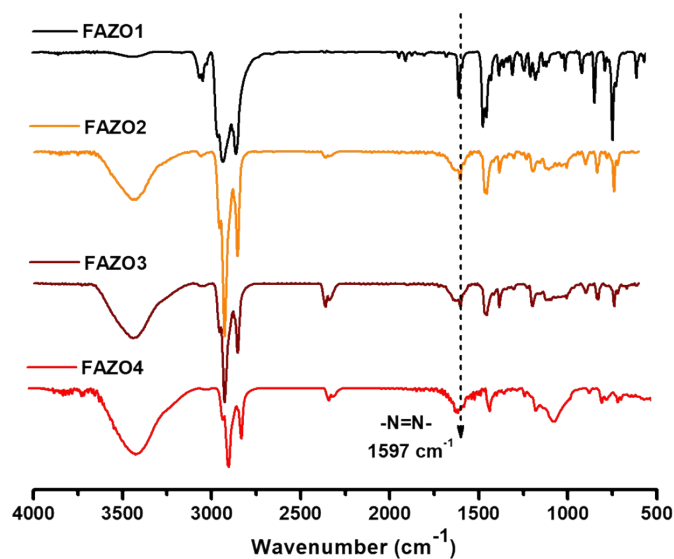

**Fig. S1.** FT-IR spectra of FAZO<sub>n</sub> (n = 1, 2, 3 and 4).

**Table S1.** Summary of Azo-oligomers FAZO<sub>n</sub> (n = 1, 2, 3 and 4).

| Entry | $M_{n,GPC}$ (g/mol) | $M_{n,th}$ (g/mol) |
|-------|---------------------|--------------------|
| FAZO1 | 990                 | 806.65             |
| FAZO2 | 1640                | 1222.97            |
| FAZO3 | 2370                | 1639.29            |
| FAZO4 | 3050                | 2055.61            |

The first-order rate constant  $k_{eS}$  of *trans*-to-*cis* photoisomerization was determined by the Formula S1<sup>1,2</sup>:

$$\text{Ln}[(A_{\infty}-A_t)/(A_{\infty}-A_0)] = -k_{eS}t \quad \text{Formula S1}$$

Where  $A_{\infty}$ ,  $A_t$ , and  $A_0$  are absorbance corresponded to the  $\pi$ - $\pi^*$  transition of *trans* isomers at infinite time, time t and time zero with irradiation of different wavelength light (404 nm, and 435 nm) at room temperature, respectively.

The first-order rate constant  $k_{HS}$  of *cis*-to-*trans* recovery was determined by the Formula S2<sup>1,2</sup>:

$$\text{Ln}[(A_{\infty}-A_t)/(A_{\infty}-A_0)] = -k_{HS}t \quad \text{Formula S2}$$

Where  $A_{\infty}$ ,  $A_t$ , and  $A_0$  are absorbance corresponded to the  $\pi$ - $\pi^*$  transition of *trans* isomers of azobenzene at infinite time, time t and time zero with irradiation of 546 nm light at room temperature.

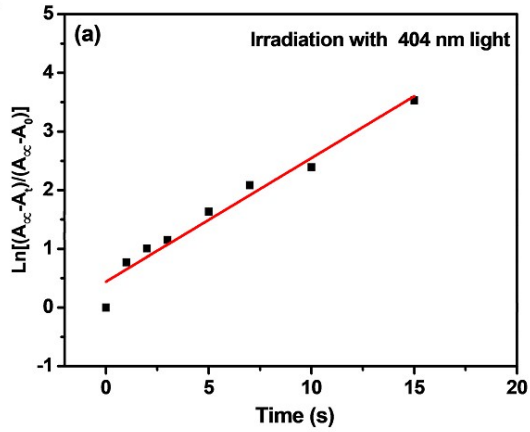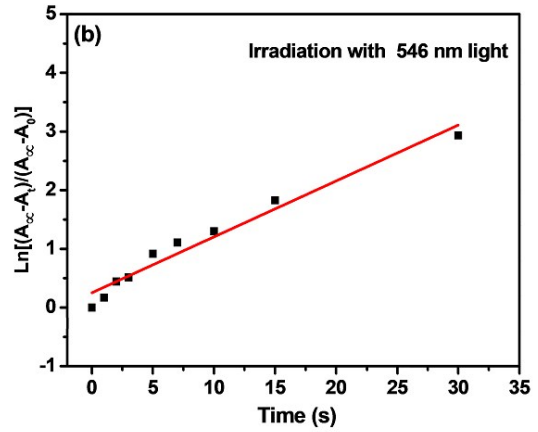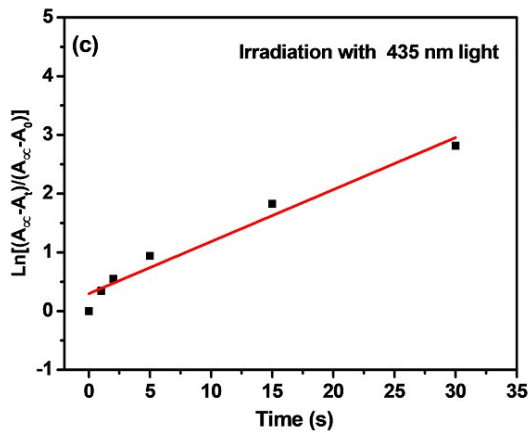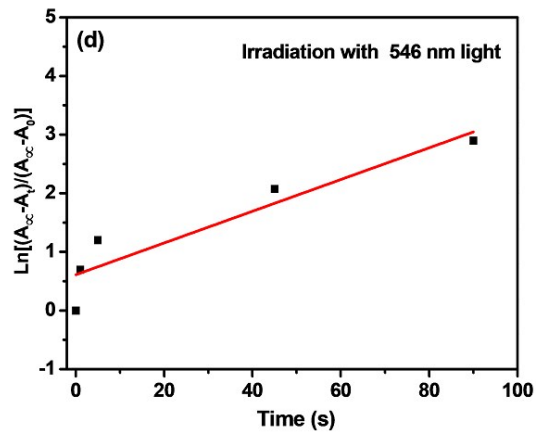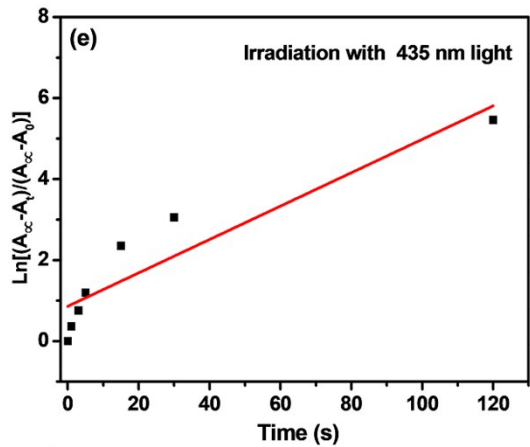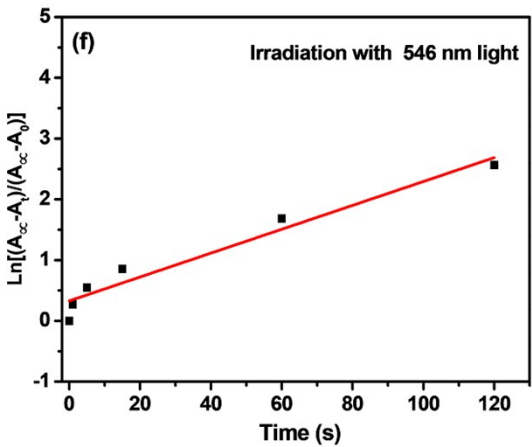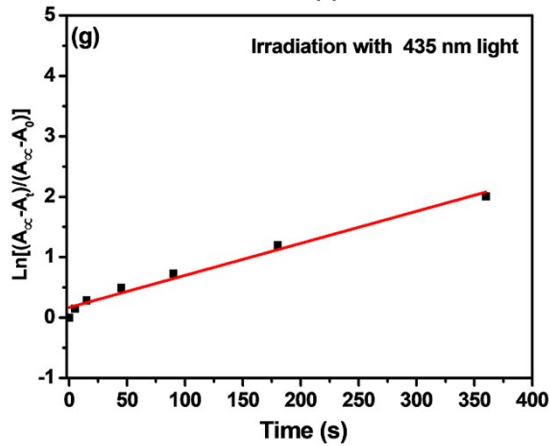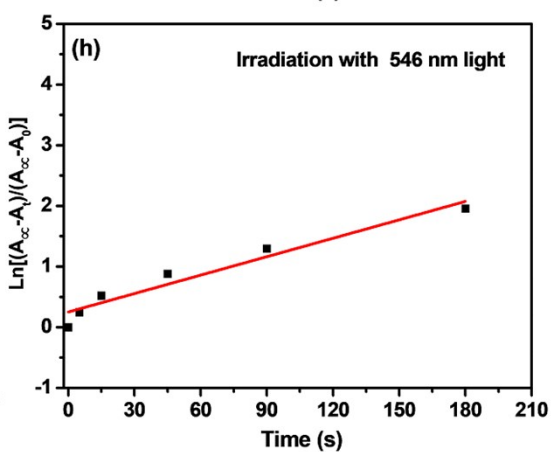

**Fig. S2** First-order kinetics for the photoisomerization of of FAZO1 (a and b), FAZO2 (c and d), FAZO3 (e and f) and FAZO4 (g and h) in DCE under different times with 404 nm, 435 nm and 546 nm light.

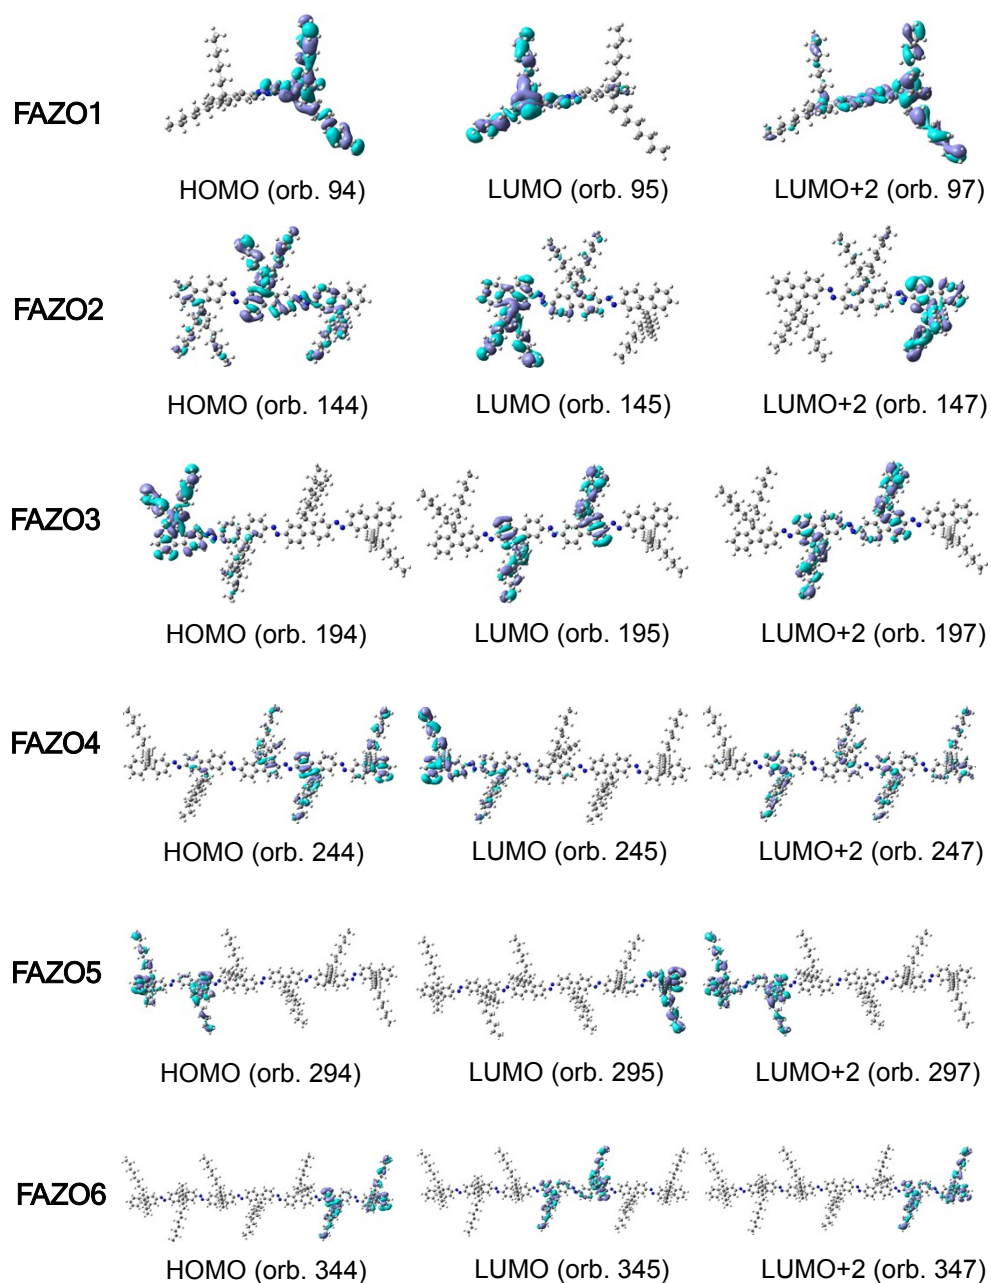

**Fig S3.** The graphical representation for molecular orbitals of FAZO<sub>n</sub> (n = 1, 2, 3, 4, 5, and 6).

**Table S2** Main Calculated Optical Transitions for FAZOn (n = 1, 2, 3, 4, 5, and 6)

| Orbital Excitations | Character             | Calcd/nm | $f^a$  |
|---------------------|-----------------------|----------|--------|
| FAZO1               |                       |          |        |
| HOMO→LUMO           | $\pi\rightarrow\pi^*$ | 345      | 1.7154 |
| HOMO→LUMO+2         | $\pi\rightarrow\pi^*$ | 225      | 0.3852 |
| FAZO2               |                       |          |        |
| HOMO→LUMO           | $\pi\rightarrow\pi^*$ | 378      | 3.0726 |
| HOMO→LUMO+2         | $\pi\rightarrow\pi^*$ | 228      | 0.1127 |
| FAZO3               |                       |          |        |
| HOMO→LUMO           | $\pi\rightarrow\pi^*$ | 394      | 4.3887 |
| HOMO→LUMO+2         | $\pi\rightarrow\pi^*$ | 312      | 0.2968 |
| FAZO4               |                       |          |        |
| HOMO→LUMO           | $\pi\rightarrow\pi^*$ | 403      | 5.7174 |
| HOMO→LUMO+2         | $\pi\rightarrow\pi^*$ | 333      | 0.4128 |
| FAZO5               |                       |          |        |
| HOMO→LUMO           | $\pi\rightarrow\pi^*$ | 408      | 7.0233 |
| HOMO→LUMO+2         | $\pi\rightarrow\pi^*$ | 349      | 0.5506 |
| FAZO6               |                       |          |        |
| HOMO→LUMO           | $\pi\rightarrow\pi^*$ | 412      | 8.3205 |
| HOMO→LUMO+2         | $\pi\rightarrow\pi^*$ | 361      | 0.6688 |

1. T. García, L. Larios-López, R. J. Rodríguez-González, G. Martínez-Ponce, C. Solano and D. Navarro-Rodríguez, *Polymer*, 2012, **53**, 2049-2061.
2. X. Jiang, J. Lu, F. Zhou, Z. Zhang, X. Pan, W. Zhang, Y. Wang, N. Zhou and X. Zhu, *Polym. Chem.*, 2016, **7**, 2645-2651
